# Supplementary material for: Production of GDP-l-fucose from exogenous fucose through the salvage pathway in Mortierella alpina
Source: Royal Society of Chemistry journal article supplement (doi:10.1039/c6ra06031e), 2016-01-01
Supplement: c6ra06031e1.pdf [file c6ra06031e1.pdf]

### Supporting materials

FIG. S1. SDS-polyacrylamide gel electrophoresis of GFPP. Proteins were denatured at 100°C for 10 min in 0.1% SDS and 1% 2-mercaptoethanol before being loaded in a 4% (wt/vol) stacking gel and separated in a 15% (wt/vol) separation gel. The gel was stained with Coomassie bright blue R250. The molecular weight markers from Thermo Scientific are shown at the left side of the panel.

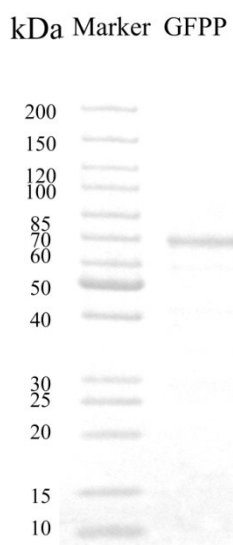

FIG. S2. Multiple amino acid sequence alignment of GFPP from different organisms. Multiple alignments were performed with the ClustalW program using the BioEdit sequence alignment software. The corresponding nucleotide sequences encoding *M. alpina* GFPP has been deposited in the GenBank/EMBL database with Accession No. 1825641. Accession numbers for the other protein sequences above are: Human GFPP (AAH32308.1), Mouse GFPP (AAI10553.1), *Dictyostelium discoideum* GFPP (XP\_638295.1), *Medicago truncatula* (XP\_003626575.1), *Bacteroides fragilis* GFPP (KFX74805.1), *Arabidopsis thaliana* GFPP (NP\_563620.1), *Pisum sativum* UDP-sugar pyrophosphorylase (BAD66876.1), *Leishmania major* UDP-sugar pyrophosphorylase (ABY79093.1), and human UDP-N-acetylglucosamine pyrophosphorylase (NP003106). The motif was boxed and other residues are marked with asterisks.

GFPP M. alpina MSSNNQAAPHTGIDDSQVLAQVHAKLKKLQRLKHPATAIPRTQA QPFDWVITAGAAQRKCVNFKSRLVGLVQRAKHVLDLDFPGSS 98  
GFPP Mouse MASREATLRRLRRSEBRGK VVAAGRFWDVAITAADPKELATKLSLRLRREPLGVQHDFVDPACAK 74  
GFPP Human MAAARDPPPSREATQLRLRRSEBRGK LVAAGRFWDVAITAADPKELATKLSLRLRREPLGVQHDFVDPACAK 78  
GFPP D. discoideum --MMELGFENDILLNQYTHSRKRTDYKGLRLEKQENKNGH-LDISSVWVWVITAILSLKVEYVQVVRKANKQNGPSPFIPVITISDPFVGR 94  
GFPP Medicago ELVSVVGEKKMERRRRRKEDLSSLKMSWHLRSVR HPSVPTADALITLASPQSAHLITSSNRKAGRTGRISPTLTTAHTDFPLRR 114  
GFPP/FUK B. fragilis KLLSLPPLNQSFEHLERLNKRTDFCTSDPWGKKKSGGGTAWLLKECYNEDGHSFSGWLGKRRLLHAGGSRGLPGYAPSGVITPVPVFRWFRG 102  
GFPP/FUK Arabidopsis --RKKADLATVLRMSWHLRSVR HPTVPTADALITLASPQSAELTVDWVRKRAKNGRTIASVITVLAETDFPLRR 79  
USP Pisum sativum MASSLGDNFLLSPQGRBIVKMLLDNGDDHFRDWPNGVDDD-EK-SAFDQVLDVSSYPGGLVAIINNAKRLA-DSKAGNPDGTFPSVIT 96  
USP Leishmania major MTFNFSNLSLQALR--EELCTPGLDQG--HLEEGWPTVDECN--ERGIALLTDVFQSNMYPGGAIVHNGHDAEESSEVDFAAEPLPLIFET 93  
UDP-GlcNAc Human --MNINDKTLTKAGTEHLLRFWNEL--EAAQQVELYAEQADDFDLNFDFDRAIEFQNSSHQKVDARLDFVPRVGLGS 79

GFPP M. alpina IGGSCSTCLVTRVREHPAD--IISKAGGCSRPHICARGKIFMTIQAADR-----ARGIQIL 158  
GFPP Mouse IGGSCSTCLVTRVREHPAD--IISKAGGCSRPHICARGKIFMTIQAADR-----ARGIQIL 136  
GFPP Human IGGSCSTCLVTRVREHPAD--IISKAGGCSRPHICARGKIFMTIQAADR-----ARGIQIL 144  
GFPP D. discoideum IGGSCSTYVLTSTIIGDDKIKN--MKLILLHAGGCSRPHICARGKIFMTIQAADR-----ARGIQIL 175  
GFPP Medicago IGGSCSTYVLTSTIIGDDKIKN--MKLILLHAGGCSRPHICARGKIFMTIQAADR-----ARGIQIL 188  
GFPP/FUK B. fragilis IGGSCSTYVLTSTIIGDDKIKN--MKLILLHAGGCSRPHICARGKIFMTIQAADR-----ARGIQIL 167  
GFPP/FUK Arabidopsis IGGSCSTYVLTSTIIGDDKIKN--MKLILLHAGGCSRPHICARGKIFMTIQAADR-----ARGIQIL 169  
USP Pisum sativum IGGSCSTYVLTSTIIGDDKIKN--MKLILLHAGGCSRPHICARGKIFMTIQAADR-----ARGIQIL 153  
USP Leishmania major IGGSCSTYVLTSTIIGDDKIKN--MKLILLHAGGCSRPHICARGKIFMTIQAADR-----ARGIQIL 156  
UDP-GlcNAc Human IGGSCSTYVLTSTIIGDDKIKN--MKLILLHAGGCSRPHICARGKIFMTIQAADR-----ARGIQIL 139

GFPP M. alpina ERMVYVYHLLLETFFPFHTSAGHLHSSNPFFSEPKPTIIALHPSSTNGSTHGVYLLHTIDWVTHDRDHPRDQSAALLKCFEHRKFSTI 257  
GFPP Mouse ERMAVYVDFPSPNDFGLTTCADHLELVGSVEYIAFDVPGIHALHPSLIAGLHGVVHSDSSQHGDELYR--QCYDFHRKFLTE 226  
GFPP Human ERMAVYVDFPSPNDFGLTTCADHLELVGSVEYIAFDVPGIHALHPSLIAGLHGVVHSDSSQHGDELYR--SCHDFHRKFLTE 234  
GFPP D. discoideum ERMAVYVDFPSPNDFGLTTCADHLELVGSVEYIAFDVPGIHALHPSLIAGLHGVVHSDSSQHGDELYR--QYKFNQIN 263  
GFPP Medicago ERMAVYVDFPSPNDFGLTTCADHLELVGSVEYIAFDVPGIHALHPSLIAGLHGVVHSDSSQHGDELYR--LVNDLDFHRKFLTE 275  
GFPP/FUK B. fragilis ERMAVYVDFPSPNDFGLTTCADHLELVGSVEYIAFDVPGIHALHPSLIAGLHGVVHSDSSQHGDELYR--AHFQDEDFE 256  
GFPP/FUK Arabidopsis ERMAVYVDFPSPNDFGLTTCADHLELVGSVEYIAFDVPGIHALHPSLIAGLHGVVHSDSSQHGDELYR--LVNDLDFHRKFLTE 255  
USP Pisum sativum ERMAVYVDFPSPNDFGLTTCADHLELVGSVEYIAFDVPGIHALHPSLIAGLHGVVHSDSSQHGDELYR--RVQTKPFGHGDWH 244  
USP Leishmania major ERMAVYVDFPSPNDFGLTTCADHLELVGSVEYIAFDVPGIHALHPSLIAGLHGVVHSDSSQHGDELYR--KLLRKPFGHGDWH 228  
UDP-GlcNAc Human ERMAVYVDFPSPNDFGLTTCADHLELVGSVEYIAFDVPGIHALHPSLIAGLHGVVHSDSSQHGDELYR--MAPDGNGGY 227

GFPP M. alpina VIKSVFRVYPDPNDSAN--DVVYDTSCHPPPTANLADMSSLHE--RCVLAWDDISFGDDHPASLSSAQDST--APSSLSPH 339  
GFPP Mouse NHRFNVAHQRSFQGNLSGGDITDCLPHTEVYDTSYVYDHRSAKMLDFKSEGINCSITDAYGDFQAAGPGATAEITNTSH--VTREESQ 322  
GFPP Human NHRFNVAHQRSFQGNLSGGDITDCLPHTEVYDTSYVYDHRSAKMLDFKSEGINCSITDAYGDFQAAGPGATAEITNTSH--VIREESE 330  
GFPP D. discoideum NHRFNVAHQRSFQGNLSGGDITDCLPHTEVYDTSYVYDHRSAKMLDFKSEGINCSITDAYGDFQAAGPGATAEITNTSH--VTFPLPH 349  
GFPP Medicago NHRFNVAHQRSFQGNLSGGDITDCLPHTEVYDTSYVYDHRSAKMLDFKSEGINCSITDAYGDFQAAGPGATAEITNTSH--VTFPLPH 339  
GFPP/FUK B. fragilis NHRFNVAHQRSFQGNLSGGDITDCLPHTEVYDTSYVYDHRSAKMLDFKSEGINCSITDAYGDFQAAGPGATAEITNTSH--VTFPLPH 344  
GFPP/FUK Arabidopsis NHRFNVAHQRSFQGNLSGGDITDCLPHTEVYDTSYVYDHRSAKMLDFKSEGINCSITDAYGDFQAAGPGATAEITNTSH--VTFPLPH 329  
USP Pisum sativum NHRFNVAHQRSFQGNLSGGDITDCLPHTEVYDTSYVYDHRSAKMLDFKSEGINCSITDAYGDFQAAGPGATAEITNTSH--DGN-SMV 321  
USP Leishmania major NHRFNVAHQRSFQGNLSGGDITDCLPHTEVYDTSYVYDHRSAKMLDFKSEGINCSITDAYGDFQAAGPGATAEITNTSH--SGDPWLV 324  
UDP-GlcNAc Human NHRFNVAHQRSFQGNLSGGDITDCLPHTEVYDTSYVYDHRSAKMLDFKSEGINCSITDAYGDFQAAGPGATAEITNTSH--SGDPWLV 297

GFPP M. alpina VQGRHLKQVLAQVSDVVAASVYFVLCVGCISGCTCHKAFMEENINPNDLGVAVVVSQPNLIDPDRNGAQSS 421  
GFPP Mouse VQGRHLKQVLAQVSDVVAASVYFVLCVGCISGCTCHKAFMEENINPNDLGVAVVVSQPNLIDPDRNGAQSS 409  
GFPP Human VQGRHLKQVLAQVSDVVAASVYFVLCVGCISGCTCHKAFMEENINPNDLGVAVVVSQPNLIDPDRNGAQSS 417  
GFPP D. discoideum VQGRHLKQVLAQVSDVVAASVYFVLCVGCISGCTCHKAFMEENINPNDLGVAVVVSQPNLIDPDRNGAQSS 428  
GFPP Medicago VQGRHLKQVLAQVSDVVAASVYFVLCVGCISGCTCHKAFMEENINPNDLGVAVVVSQPNLIDPDRNGAQSS 431  
GFPP/FUK B. fragilis VQGRHLKQVLAQVSDVVAASVYFVLCVGCISGCTCHKAFMEENINPNDLGVAVVVSQPNLIDPDRNGAQSS 435  
GFPP/FUK Arabidopsis VQGRHLKQVLAQVSDVVAASVYFVLCVGCISGCTCHKAFMEENINPNDLGVAVVVSQPNLIDPDRNGAQSS 411  
USP Pisum sativum VQGRHLKQVLAQVSDVVAASVYFVLCVGCISGCTCHKAFMEENINPNDLGVAVVVSQPNLIDPDRNGAQSS 420  
USP Leishmania major VQGRHLKQVLAQVSDVVAASVYFVLCVGCISGCTCHKAFMEENINPNDLGVAVVVSQPNLIDPDRNGAQSS 424  
UDP-GlcNAc Human VQGRHLKQVLAQVSDVVAASVYFVLCVGCISGCTCHKAFMEENINPNDLGVAVVVSQPNLIDPDRNGAQSS 363

GFPP M. alpina PLYIENVLAPEAFHPCSTAVD--SCLPRDAIPKSCVFTIQLDREVTFTFLSKDDIRHMPASVITATLSDEEAIAEADRLYIPRVVPSRMIP 519  
GFPP Mouse VLEISKQ--PEISGNCNIS--SSLAKTVPVPSFLCSASRLIN--GHRYSTVFGQDNLKNKSATLEDIHALQFGG--CFLSCDDNPK 498  
GFPP Human VLEISKQ--PEISGNCNIS--SYLTKAALPAPSVCSSRLIN--RCRYATWVFGQDNLKNKSATLEDIHALQFGG--CFLSCDDNPK 507  
GFPP D. discoideum VLEISKQ--PEISGNCNIS--LFEFNSNEQQQQQQQQQQQQQQQQQQSSSNTYIEIPSNFVITQLSI--CNVYVITPQDIDDKSTNPKFQ 526  
GFPP Medicago VLEISKQ--PEISGNCNIS--LFEFNSNEQQQQQQQQQQQQQQQQQQSSSNTYIEIPSNFVITQLSI--CNVYVITPQDIDDKSTNPKFQ 525  
GFPP/FUK B. fragilis VLEISKQ--PEISGNCNIS--LFEFNSNEQQQQQQQQQQQQQQQQQQSSSNTYIEIPSNFVITQLSI--CNVYVITPQDIDDKSTNPKFQ 533  
GFPP/FUK Arabidopsis VLEISKQ--PEISGNCNIS--LFEFNSNEQQQQQQQQQQQQQQQQQQSSSNTYIEIPSNFVITQLSI--CNVYVITPQDIDDKSTNPKFQ 503  
USP Pisum sativum VLEISKQ--PEISGNCNIS--LFEFNSNEQQQQQQQQQQQQQQQQQQSSSNTYIEIPSNFVITQLSI--CNVYVITPQDIDDKSTNPKFQ 510  
USP Leishmania major VLEISKQ--PEISGNCNIS--LFEFNSNEQQQQQQQQQQQQQQQQQQSSSNTYIEIPSNFVITQLSI--CNVYVITPQDIDDKSTNPKFQ 521  
UDP-GlcNAc Human VLEISKQ--PEISGNCNIS--LFEFNSNEQQQQQQQQQQQQQQQQQQSSSNTYIEIPSNFVITQLSI--CNVYVITPQDIDDKSTNPKFQ 523

GFPP M. alpina PHQAHPLTGATVEAPSAGS--VNAPVFEVARTAQ--SSRLADHRRDRI--NCLDGAPAEVVCN--PDVSRPGADVGVNLSNAARKAREYE 608  
GFPP Mouse ATIKLPLS--GNKMNISLWARTAPPCSSLS--SATASGILSAYVNHSPNLSDPN--LLSDFEVLVYAVDMLAYREHIFLSSNNKIQ 584  
GFPP Human VTEPLPLS--GNKTCISLWARTAPPCSSLS--SATITSELDNAYVNHSPNLSTYK--LLSDFEVLVYAVDMLAYREHIFLSSNNKSS 593  
GFPP D. discoideum LKLYNL--SINTSDNNNNNS--NANAPPSISNIPKSLKLTNGLKTKT--QTFPSNNEQPPQQQQQSYYSL--EONRELLSKQFIRRSNTNLLNKNK 626  
GFPP Medicago ETLWGS--SGTDVQV--NSHFPPLPYAQM--KSWM--VYVQTE--NLSLWRA--QRTISEEHRSHRT--CIGSSHQADLAAGIA- 612  
GFPP/FUK B. fragilis NRMLRAR--ILKLDGKDYRPEEQAA--LDLDGGLB--SNRSEPKLDTYS--GIVWGRVPRVDMAGGWIDTPPYSLSYG--VNLATEINGPPLGVTV 630  
GFPP/FUK Arabidopsis ESILWSS--YVAQDR--WNAH--PILTYSEM--KASW--GDDSNKR--IKLWRS--QRYSE--EFGHSIN--PONGSS--HQAD--AGGIAK 591  
USP Pisum sativum SISQRSI--LAIKGRK--FID--LDGALVDAV--D--AEVNSG--VQ--GWALEPVD--YKDSSEPE--LRIG--RPNK--VQ--VEKKYSEPFKFD 598  
USP Leishmania major HLDQHSI--LIVEGR--VHESLE--GALTIRGPTD--SMALPH--VRNAYV--RAGWSVH--ILSLCAGRSR--SADRIG--M--KKTAM--V--D--CKTG--ESEA 618  
UDP-GlcNAc Human WWLNAGG--HFID--ENGSE--PARE--L--K--DAND--PI--Q--SPLI--STAGE--I--E--SY--WAD--E--H--AP--I--D--GVH--V--KNGI-- 505

Fig. S3. Phylogenetic tree of amino acid hydroxylases from different organisms. The tree was constructed using the neighbor-joining method with ClustalW NJplot. The horizontal branch length is proportional to the amino acid substitution rate per site.

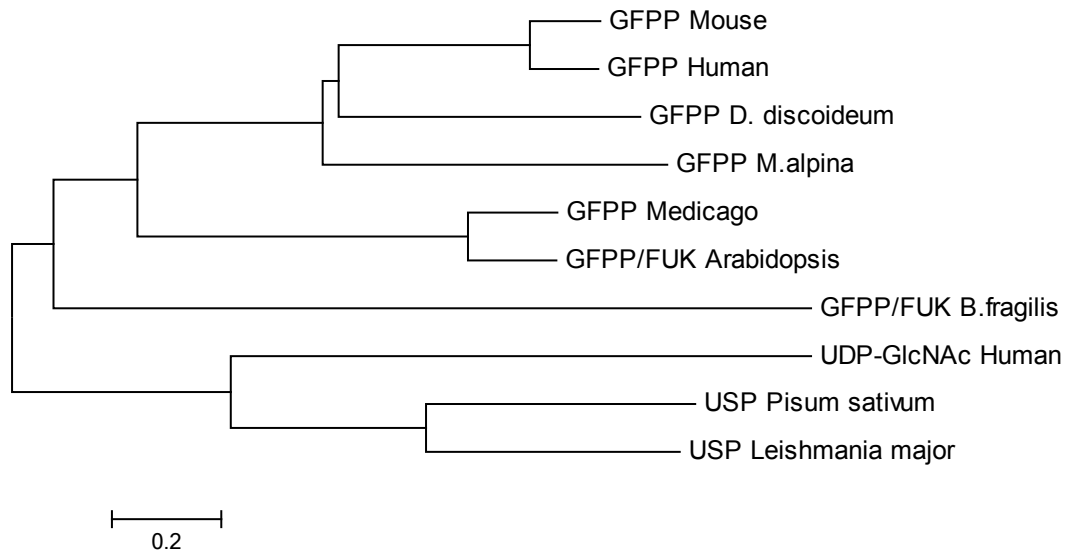

Figure S4. LC-MS chromatographs of GFPP reaction with the addition of MgCl<sub>2</sub> (C, D), MnCl<sub>2</sub> (E, F), KCl (G, H), CuCl<sub>2</sub> (I, J), CoCl<sub>2</sub> (K, L), FeCl<sub>2</sub> (M, N), CaCl<sub>2</sub> (O, P), ZnCl<sub>2</sub> (Q, R), NiSO<sub>4</sub> (S, T), and HgCl<sub>2</sub>(U, V); LC-MS chromatographs of GFPP reaction with the addition of MgCl<sub>2</sub> and EDTA (W, X); Extracted ion chromatogram (XIC) of L-fucose-1-phosphate standard (A, m/z 243.03); XIC of GDP-L-fucose standard (B, m/z 588.08); XIC of L-fucose-1-phosphate (C, E, G, I, K, M, O, Q, S, U and W; m/z 243.03); XIC of the GDP-L-fucose (D, F, H, J, L, N, P, R, T, V and X; m/z 588.08).

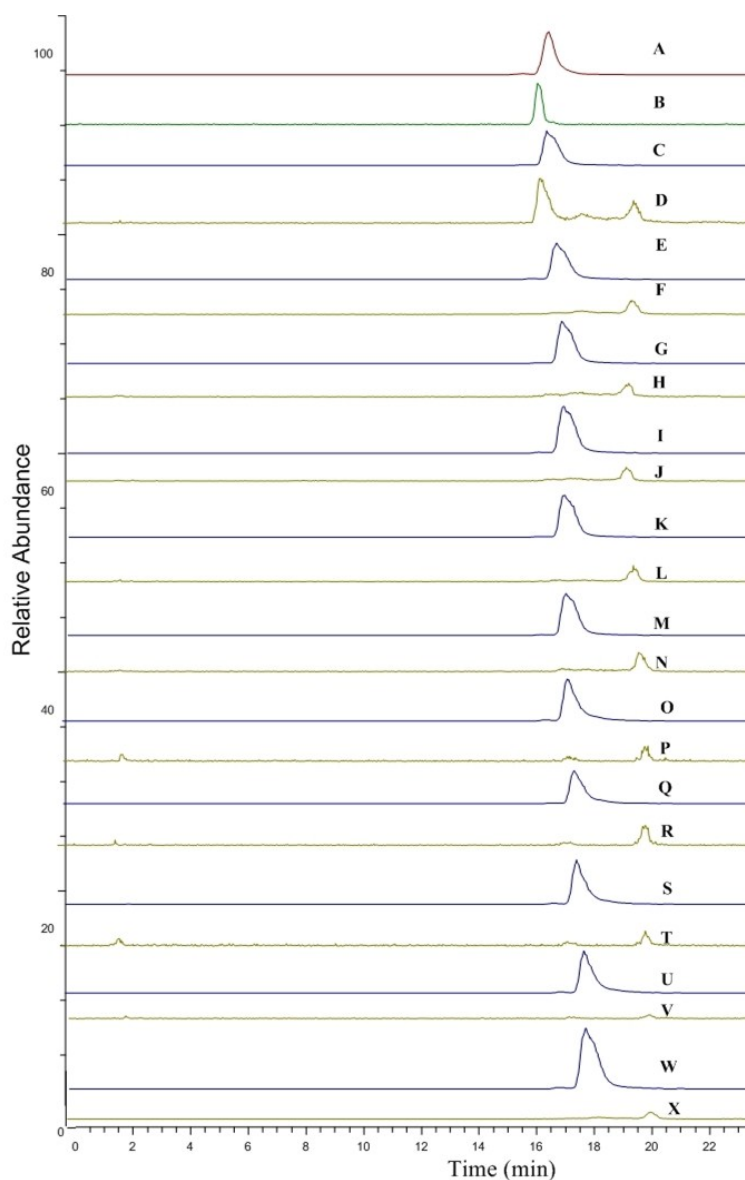

Figure S5. The kinetic parameters of GFPP for L-fucose-1-phosphate.

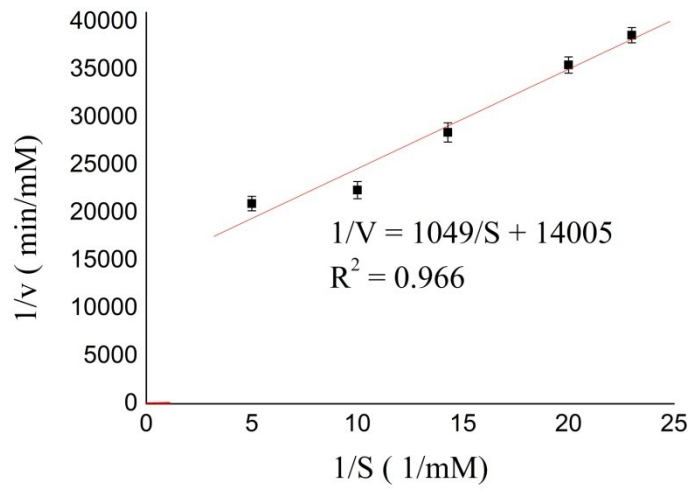

Table S2. Gradient elution of the chromatographic separation

| Time<br>(min) | Flow rate<br>(mL/min) | B% |
|---------------|-----------------------|----|
| 0             | 0.1                   | 80 |
| 5             | 0.1                   | 80 |
| 21            | 0.1                   | 56 |
| 22            | 0.2                   | 40 |
| 26            | 0.2                   | 40 |
| 27            | 0.2                   | 80 |
| 34            | 0.2                   | 80 |
| 35            | 0.1                   | 80 |

Table S3. Summary of GDP-L-fucose content in *M. alpina*.

| Samples                                           | Dry cell weight (g/L) | GDP-L-fucose concentration (mg/L) | Specific GDP-L-fucose content (mg / g cell) |
|---------------------------------------------------|-----------------------|-----------------------------------|---------------------------------------------|
| Control                                           | 11.76±0.32            | 2.50±0.0047                       | 0.21±0.0015                                 |
| 1day fucose (10 nM)                               | 12.36±0.27            | 2.64±0.0052                       | 0.21±0.0019                                 |
| 3days fucose (10 nM)                              | 11.67±0.37            | 3.76±0.0053                       | 0.32±0.0014                                 |
| 3days Mg <sup>2+</sup> (10 nM)                    | 12.34±0.29            | 3.12±0.0046                       | 0.25±0.0016                                 |
| 3days fucose (1 nM) and Mg <sup>2+</sup> (10 nM)  | 12.30±0.32            | 2.68±0.0049                       | 0.22±0.0015                                 |
| 3days fucose (5 nM) and Mg <sup>2+</sup> (10 nM)  | 11.43±0.33            | 2.92±0.0044                       | 0.26±0.0013                                 |
| 3days fucose (10 nM) and Mg <sup>2+</sup> (10 nM) | 12.31±0.37            | 7.02±0.0049                       | 0.57±0.0013                                 |
| 3days fucose (20 nM) and Mg <sup>2+</sup> (10 nM) | 12.53±0.29            | 8.15±0.0051                       | 0.65±0.0018                                 |
| 3days fucose (30 nM) and Mg <sup>2+</sup> (10 nM) | 12.62±0.35            | 8.58±0.0052                       | 0.68±0.0015                                 |
