# Supplementary material for: Production of GDP-l-fucose from exogenous fucose through the salvage pathway in Mortierella alpina
Source: Royal Society of Chemistry journal article supplement (doi:10.1039/c6ra06031e), 2016-01-01
Supplement: c6ra06031e2.xlsx [file c6ra06031e2.xlsx]

## Sheet: Sheet1
Table. S1 Gene searching and transcriptome analysisresults
serial	gene_id	pfam_ipr	sample_B_FPKM	sample_E_FPKM	sample_K_FPKM	sample_L_FPKM	sample_M_FPKM	kegg_ko	kegg_ko	kegg_ko	kegg_ko	kegg_ko	kegg_ko	kegg_ko	kegg_ko	kegg_ko	kegg_ko	kegg_ko	kegg_ko	brenda	brenda	brenda	brenda	brenda	brenda	brenda	brenda	brenda	brenda	string	string	string	string	string	string	string	string	string	string	string	string	kogcog	kogcog	kogcog	kogcog	kogcog	kogcog	kogcog	kogcog
5208	MA-00153-272	Aldo/keto reductase	6.5954	13.6144	3.61874	1.94374	2.95097	cai	Catenulispora acidiphila	K00064	1.1.1.122	D-threo-aldose 1-dehydrogenase	00053 Ascorbate and aldarate metabolism	Length = 313	Expect = 8e-09	8e-09	Identities = 57/196 (29%)	57/196	0.29	Catenulispora acidiphila (strain DSM 44928 / NRRL B-24433 / NBRC 102108 / JCM 14897)	1.1.1.107	pyridoxal 4-dehydrogenase	pyridoxal:NAD+ 4-oxidoreductase	Length = 313	Expect = 5e-09	5e-09	Identities = 57/196 (29%)	57/196	0.29	Leptospira borgpetersenii serovar Hardjo-bovis JB197	Aldo/keto oxidoreductase	COG0667	Predicted oxidoreductases (related to aryl-alcohol dehydrogenases)	C	Energy production and conversion	Length = 511	Expect = 2e-40	2e-40	Identities = 138/472 (29%)	138/472	0.29	Hbs	Halobacterium sp. NRC-1	COG0667	Predicted oxidoreductases (related to aryl-alcohol dehydrogenases)	C	Energy production and conversion	Length = 362	Expect = 2e-15
10009	MA-00297-324	fucose-1-phosphate guanylyltransferase	13.3884	16.3797	17.2567	22.2158	18.5562	mmu	Mus musculus	K00976	2.7.7.30	fucose-1-phosphate guanylyltransferase	00051 Fructose and mannose metabolism///00520 Amino sugar and nucleotide sugar metabolism	Length = 590	Expect = 4e-54	4e-54	Identities = 165/548 (30%)	165/548	0.3	Homo sapiens	2.7.7.30	fucose-1-phosphate guanylyltransferase	GTP:beta-L-fucose-1-phosphate guanylyltransferase	Length = 594	Expect = 4e-54	4e-54	Identities = 170/564 (30%)	170/564	0.3	Mus musculus	fucose-1-phosphate guanylyltransferase	NOG147580				Length = 590	Expect = 6e-54	6e-54	Identities = 165/548 (30%)	165/548	0.3
[truncated: 38 more columns]
